# Supplementary material for: Genetic Architecture of Delayed Senescence, Biomass, and Grain Yield under Drought Stress in Cowpea
Source: PLoS One. 2013 Jul 30;8(7):e70041. doi: 10.1371/journal.pone.0070041 (PMC3728364; doi:10.1371/journal.pone.0070041)
Supplement: Table S2 — Suggestive marker-trait associations based on MLM analysis. (XLSX) [file pone.0070041.s004.xlsx]

## Sheet: Sheet1
Table S2 Suggestive marker-trait associations based on MLM analysis
Trait_Experiment	SNP marker	LG	Position (cM)	P-value	r2	IT93K-503-1 X CB46 QTLs
Seed Weight per plant_BF 2009B	1_0029	1	18.42	0.00016232	0.0504
Pod weight per plant_BF 2009C	1_0029	1	18.42	0.0029	0.0181	Dro-7
100-seed weight_BF 2009A	1_0029	1	18.42	0.0047	0.0228
Biomass_BF 2009C	1_0029	1	18.42	0.0049	0.0256
Seed weight per plant_BF 2009C	1_0029	1	18.42	0.0059	0.0158
Grain yield_USA 2008	1_0737	1	19.159	0.0032	0.0256
100-seed weight_BF 2009A	1_0737	1	19.159	0.0037	0.0239	Dro-7
Seed weight per plant_BF 2009C	1_0737	1	19.159	0.0067	0.0153
Pod weight per plant_BF 2009C	1_0737	1	19.159	0.0069	0.0152
Seed weight per plant_BF 2009B	1_0737	1	19.159	0.0069	0.0247
100-seed weight_BF 2009C	1_0737	1	19.159	0.009	0.0318
Pod number per plant_BF 2009C	1_0256	1	41.908	0.005	0.0131
Biomass_BF 2008	1_0625	1	41.908	0.0075	0.0247
Biomass_BF 2008	1_0589	2	17.046	0.00022067	0.0493
Grain yield_BF 2008	1_0589	2	17.046	0.0014	0.044
Biomass_BF 2008	1_0585	2	36.062	0.0045	0.0308
Grain yield_BF 2008	1_0585	2	36.062	0.005	0.0358
Seed number per plant_BF 2009C	1_1505	2	36.062	0.0042	0.0261
Biomass_BF 2009B	1_1505	2	36.062	0.0077	0.022
Biomass_BF 2008	1_0994	2	47.436	0.0054	0.0274	Dro-5
Grain yield_BF 2008	1_0994	2	47.436	0.0078	0.0297
Seed weight per plant_BF 2009A	1_0144	2	55.378	0.0017	0.0434	Dro-5
Pod weight per plant_BF 2009A	1_0144	2	55.378	0.0018	0.045
Pod number per plant_BF 2009B	1_0144	2	55.378	0.0019	0.0306
Pod Weight per plant_BF 2009B	1_0144	2	55.378	0.0026	0.0284
Seed number per plant_BF 2009B	1_0144	2	55.378	0.0042	0.0285
Seed weight per plant_BF 2009B	1_0144	2	55.378	0.0043	0.0261
Biomass_BF 2009B	1_0670	2	63.684	0.0017	0.0323
100-seed weight_BF 2009A	1_0670	2	63.684	0.0039	0.021
Senescence_Greenhouse 2	1_1352	2	64.214	0.0059	0.0255	Dro-9
Biomass_BF 2009B	1_1352	2	64.214	0.0097	0.0215
Grain yield_USA 2008	1_0599	2	81.022	0.0035	0.0239	Dro-9
Grain yield_Nigeria 2007	1_0599	2	81.022	0.0088	0.0086
Seed number per pod_BF 2009B	1_0447	3	0.622	0.0025	0.0426
Seed number per pod_BF 2009A	1_0447	3	0.622	0.0055	0.0302
Biomass_BF 2008	1_0244	3	8.262	0.0048	0.0263
Senescence_Greenhouse 1	1_0244	3	8.262	0.0068	0.0183
Biomass_BF 2009A	1_0244	3	8.262	0.0069	0.0279
100-seed weight_BF 2009C	1_1056	3	10.227	0.0051	0.0359
Senescence_Greenhouse 2	1_1416	3	10.227	0.0076	0.0279
Senescence_Greenhouse 2	1_0067	3	10.556	0.00015858	0.0573
Senescence_Greenhouse 1	1_0067	3	10.556	0.005	0.0186
Senescence_Greenhouse 1	1_1117	3	12.941	0.0038	0.0175
Senescence_Greenhouse 2	1_1117	3	12.941	0.0081	0.0238
Biomass_Nigeria 2007	1_1117	3	12.941	0.0087	0.009
Biomass_BF 2008	1_0017	3	17.573	0.0078	0.0249
Senescence_BF 2008	1_0475	3	17.573	0.0098	0.0114
Biomass_BF 2009B	1_0636	3	19.066	0.00038269	0.0431
Senescence_Nigeria 2007	1_0636	3	19.066	0.0036	0.0099
Senescence_Greenhouse 2	1_0636	3	19.066	0.0069	0.024
Senescence_Greenhouse 2	1_0636	3	19.066	0.0074	0.0244
Senescence_Nigeria 2007	1_1349	3	19.118	0.00058864	0.0137
Senescence_Greenhouse 2	1_1349	3	19.118	0.0032	0.0278
Biomass_BF 2009B	1_1349	3	19.118	0.0053	0.0266
Grain yield_USA 2008	1_0545	3	25.582	0.0039	0.0247
100-seed weight_BF 2009C	1_1348	3	25.582	0.002	0.0427
Biomass_BF 2009A	1_1348	3	25.582	0.0058	0.0314
Senescence_Greenhouse 1	1_0163	3	30.382	0.0014	0.0214
Pod number per plant_BF 2009A	1_0163	3	30.382	0.0075	0.0286
Grain yield_USA 2007C	1_0740	3	31.096	0.0025	0.0529
Biomass_BF 2009C	1_0740	3	31.096	0.0035	0.0268
100-seed weight_BF 2009C	1_0740	3	31.096	0.0063	0.034
Seed number per plant_BF 2009A	1_0740	3	31.096	0.0074	0.0268
Grain yield_USA 2008	1_0971	3	32.698	0.0044	0.0232
Biomass_Senegal 2008	1_1300	3	32.698	0.003	0.0415
Senescence_Greenhouse 1	1_1300	3	32.698	0.0059	0.0161
Biomass_BF 2008	1_0444	3	38.304	0.0061	0.0238
Pod weight per plant_BF 2009B	1_1027	3	38.304	0.0082	0.0205
Seed weight per plant_BF 2009B	1_1027	3	38.304	0.009	0.0199
Grain yield_BF 2008	1_0139	3	39.935	0.00072963	0.0478
Biomass_BF 2008	1_0139	3	39.935	0.0036	0.0289
100-seed weight_BF 2009C	1_0139	3	39.935	0.0098	0.0305
Seed weight per plant_BF 2009A	1_0464	3	64.146	0.0044	0.0342	Dro-10
100-seed weight_BF 2009C	1_0464	3	64.146	0.0047	0.0366
Senescence_Greenhouse 1	1_0206	4	0.009	7.7146e-05	0.0386
Biomass_Senegal 2008	1_0206	4	0.009	0.0041	0.0377
Seed number per plant_BF 2009A	1_0052	4	0.455	0.0047	0.0306
Seed number per plant_BF 2009A	1_0054	4	0.455	0.0065	0.0301
Seed weight per plant_BF 2009A	1_0888	4	0.455	0.00040392	0.0562
Pod weight per plant_BF 2009A	1_0888	4	0.455	0.00084156	0.0524
Seed weight per plant_BF 2009C	1_0888	4	0.455	0.0009709	0.0222
Pod weight per plant_BF 2009C	1_0888	4	0.455	0.0021	0.0193
Seed number per plant_BF 2009A	1_0888	4	0.455	0.0034	0.0346
100-seed weight_BF 2009C	1_0888	4	0.455	0.0085	0.0323
Senescence_Greenhouse 2	1_1209	4	34.262	0.0018	0.0287	Dro-8
Grain yield_USA 2008	1_1209	4	34.262	0.0039	0.0232
Senescence_USA 2009	1_0910	4	50.398	0.0077	0.0321	Dro-8
Biomass_Senegal 2008	1_1013	4	50.398	0.008	0.0326
Grain yield_Nigeria 2007	1_0407	4	65.546	0.0081	0.0088
Grain yield_Nigeria 2007	1_0875	4	65.546	0.0081	0.0088
Senescence_BF 2008	1_1191	4	65.546	0.0085	0.0158
Grain yield_USA 2007C	1_1147	4	66.413	0.0035	0.0503
Seed weight per plant_BF 2009C	1_1147	4	66.413	0.0069	0.0151
Grain yield_USA 2007C	1_0045	5	7.508	0.0025	0.0528
Seed weight per plant_BF 2009A	1_0442	5	7.508	0.0068	0.0334
Seed weight per plant_BF 2009A	1_1366	5	7.508	0.0056	0.0351
Pod weight per plant_BF 2009A	1_1366	5	7.508	0.0087	0.032
Grain yield_USA 2007C	1_0049	5	9.456	0.00019202	0.0954
Grain yield_USA 2007A	1_0049	5	9.456	0.0057	0.0585
Seed weight per plant_BF 2009B	1_0507	5	12.571	0.0014	0.0345
Senescence_Nigeria 2007	1_0979	5	12.571	0.0015	0.0117
Grain yield_Nigeria 2007	1_0979	5	12.571	0.0076	0.009
100-seed weight_BF 2009B	1_0986	5	28.249	0.0033	0.0221
Seed weight per plant_BF 2009C	1_0986	5	28.249	0.0062	0.0182
Biomass_Nigeria 2007	1_0800	5	29.203	0.0015	0.0132
Grain yield_Nigeria 2007	1_0800	5	29.203	0.0026	0.0113
Senescence_Nigeria 2007	1_0800	5	29.203	0.0081	0.008
Seed number per plant_BF 2009B	1_0242	5	34.44	0.0033	0.0278
Pod number per plant_BF 2009A	1_0242	5	34.44	0.004	0.0321
Seed number per plant_BF 2009A	1_0242	5	34.44	0.0097	0.0283
Seed weight per plant_BF 2009B	1_0127	5	43.344	0.0017	0.0322
Pod weight per plant_BF 2009B	1_0127	5	43.344	0.0021	0.0303
Pod number per plant_BF 2009B	1_0127	5	43.344	0.0023	0.03
Pod weight per plant_BF 2009C	1_0127	5	43.344	0.006	0.0154
100-seed weight_BF 2009A	1_0127	5	43.344	0.0087	0.0176
Seed weight per plant_BF 2009B	1_0691	6	0.423	0.00090729	0.0357
Seed number per plant_BF 2009B	1_0691	6	0.423	0.0035	0.0305
Pod weight per plant_BF 2009B	1_0691	6	0.423	0.0037	0.027
Biomass_Senegal 2008	1_0691	6	0.423	0.0042	0.0379
Grain yield_Senegal 2008	1_0691	6	0.423	0.0047	0.0362
100-seed weight_BF 2009B	1_0825	6	7.925	0.0027	0.0223	Dro-4
100-seed weight_BF 2009A	1_0825	6	7.925	0.0039	0.0243
Senescence_Nigeria 2007	1_0123	6	43.659	0.0054	0.0089
Biomass_Nigeria 2007	1_0123	6	43.659	0.0088	0.009
Senescence_Nigeria 2007	1_0541	6	43.659	0.0057	0.0088
Seed weight per plant_BF 2009C	1_1273	6	55.993	0.0043	0.0164
Pod weight per plant_BF 2009C	1_1273	6	55.993	0.007	0.0146
Grain yield_Nigeria 2007	1_1273	6	55.993	0.0078	0.0088
Seed weight per plant_BF 2009A	1_0439	7	13.004	0.0037	0.0376	Dro-1
Biomass_Nigeria 2007	1_0529	7	13.004	0.0052	0.0102
Senescence_BF 2008	1_0047	7	15.844	0.002	0.0203	Dro-1
Senescence_BF 2008	1_0108	7	15.844	0.00067576	0.0229
Biomass_BF 2008	1_0108	7	15.844	0.0058	0.0301
Biomass_BF 2008	1_1150	7	15.844	0.0036	0.0332
Grain yield_BF 2008	1_1150	7	15.844	0.0079	0.0312
Biomass_BF 2008	1_1215	7	15.844	0.0054	0.0303
Senescence_Greenhouse 1	1_0279	7	18.213	0.0027	0.0193	Dro-1
Seed weight per plant_BF 2009B	1_0279	7	18.213	0.0073	0.0246
Senescence_USA 2009	1_0983	7	19.081	9.1245e-05	0.0699	Dro-1
Senescence_Greenhouse 1	1_0983	7	19.081	0.0024	0.0215
Senescence_USA 2009	1_1482	7	19.081	0.00091715	0.0508
Senescence_Senegal 2008	1_0648	7	28.25	0.0016	0.0224	Dro-1
Biomass_Senegal 2008	1_0648	7	28.25	0.0037	0.0389
Senescence_USA 2009	1_0696	7	28.25	0.0088	0.031
Biomass_Senegal 2008	1_0477	7	28.461	0.0047	0.0367	Dro-1
100-seed weight_BF 2009A	1_1057	7	28.461	0.0097	0.017
Seed weight per plant_BF 2009A	1_0469	7	34.537	0.00064826	0.052	Dro-1
Grain yield_BF 2008	1_0469	7	34.537	0.0072	0.0318
Seed weight per plant_BF 2009A	1_0006	7	45.839	0.0017	0.0442
Biomass_BF 2009B	1_0006	7	45.839	0.005	0.0259
Biomass_BF 2008	1_1446	7	45.839	0.002	0.0377
Biomass_BF 2009B	1_1446	7	45.839	0.0075	0.0236
Biomass_BF 2009B	1_0261	7	50.415	0.0099	0.0228
Biomass_BF 2009B	1_0763	7	50.415	0.0099	0.0228
Biomass_BF 2009B	1_1418	7	50.415	0.009	0.023
Seed weight per plant_BF 2009A	1_1521	7	50.415	0.0066	0.0343
Biomass_BF 2009B	1_1521	7	50.415	0.0094	0.0223
Pod number per plant_BF 2009A	1_1008	8	11.696	0.0003608	0.0437
Seed number per plant_BF 2009B	1_1008	8	11.696	0.0019	0.0312
100-seed weight_BF 2009B	1_1008	8	11.696	0.0036	0.0217
Pod number per plant_BF 2009B	1_1008	8	11.696	0.0048	0.024
Seed number per plant_BF 2009A	1_1008	8	11.696	0.0051	0.0305
Seed weight per plant_BF 2009A	1_0410	8	22.337	0.0012	0.0459
Senescence_Senegal 2008	1_0410	8	22.337	0.0039	0.0194
Seed number per plant_BF 2009B	1_0838	8	34.705	0.0026	0.0313	Dro-3
Pod number per plant_BF 2009A	1_0838	8	34.705	0.0084	0.0288
100-seed weight_BF 2009A	1_1198	8	48.104	0.00073582	0.0318	Dro-3
Pod weight per plant_BF 2009C	1_1198	8	48.104	0.0087	0.0139
Grain yield_USA 2007B	1_0097	9	7.646	0.0049	0.0467
Grain yield_USA 2007A	1_0097	9	7.646	0.0059	0.058
Seed weight per plant_BF 2009B	1_0371	9	15.712	0.0043	0.0265
Seed number per pod_BF 2009A	1_0371	9	15.712	0.0091	0.0287
Senescence_BF 2008	1_1202	9	22.748	0.0053	0.0161
Grain yield_Nigeria 2007	1_1202	9	22.748	0.0073	0.0091
Biomass_BF 2009A	1_1202	9	22.748	0.0098	0.0274
Senescence_USA 2009	1_1520	10	19.226	0.0016	0.0452
Pod weight per plant_BF 2009C	1_1520	10	19.226	0.0038	0.0168
Pod number per plant_BF 2009C	1_1520	10	19.226	0.0085	0.0116
Grain yield_Nigeria 2007	1_0140	10	34.896	0.00045204	0.0154	Dro-3
Senescence_Nigeria 2007	1_0140	10	34.896	0.009	0.0079
Seed number per pod_BF 2009C	1_0759	10	35.578	0.0082	0.0329	Dro-3
Grain yield_Nigeria 2007	1_0759	10	35.578	0.0094	0.0085
Senescence_USA 2009	1_1405	10	37.373	0.00021446	0.0634	Dro-3
Pod number per plant_BF 2009A	1_1405	10	37.373	0.0057	0.0331
Seed number per plant_BF 2009A	1_1405	10	37.373	0.0084	0.0321
Senescence_USA 2009	1_1018	10	37.659	0.0014	0.0473	Dro-3
Grain yield_USA 2007C	1_1018	10	37.659	0.0053	0.0526
100-seed weight_BF 2009B	1_0754	10	38.187	0.0081	0.0179	Dro-3
Seed number per plant_BF 2009C	1_0754	10	38.187	0.0088	0.0219
Seed number per plant_BF 2009A	1_0537	10	38.457	0.0026	0.042	Dro-3
Seed number per pod_BF 2009C	1_0537	10	38.457	0.0074	0.0337
Pod number per plant_BF 2009B	1_0730	10	38.985	0.0076	0.0229	Dro-3
100-seed weight_BF 2009C	1_0952	10	38.985	0.0043	0.0372
Seed number per plant_BF 2009C	1_0406	10	41.214	0.0074	0.0246
Senescence_Nigeria 2007	1_0406	10	41.214	0.0086	0.0083
Grain yield_BF 2008	1_0007	10	43.532	0.0059	0.0314
Biomass_Senegal 2008	1_0007	10	43.532	0.0086	0.0318
Grain yield_USA 2007A	1_0230	10	44.776	0.0073	0.0554
Senescence_Greenhouse 2	1_0230	10	44.776	0.008	0.0224
Seed number per plant_BF 2009A	1_0955	11	30.658	0.0022	0.0377	Dro-3
Grain yield_USA 2007C	1_0955	11	30.658	0.003	0.0446
Seed weight per plant_BF 2009A	1_0955	11	30.658	0.0048	0.0328
Seed weight per plant_BF 2009A	1_0955	11	30.658	0.0061	0.0304
Pod weight per plant_BF 2009A	1_0955	11	30.658	0.0084	0.0321
Pod number per plant_BF 2009A	1_0955	11	30.658	0.0095	0.0265
Biomass_Senegal 2008	1_0013	11	34.447	0.0024	0.0426	Dro-3
Grain yield_USA 2007C	1_0562	11	34.447	0.000411	0.0708
Grain yield_USA 2007B	1_0562	11	34.447	0.00094507	0.0596
Seed weight per plant_BF 2009A	1_0562	11	34.447	0.0011	0.0447
Grain yield_USA 2007A	1_0562	11	34.447	0.0023	0.0708
Grain yield_USA 2007C	1_1180	11	43.016	0.0035	0.0591	Dro-3
Grain yield_USA 2007A	1_1180	11	43.016	0.0037	0.0675
Grain yield_USA 2007B	1_1180	11	43.016	0.006	0.041
Pod weight per plant_BF 2009C	1_0190	12	0	0.009	0.0141
Seed weight per plant_BF 2009C	1_0190	12	0	0.0098	0.0138
100-seed weight_BF 2009B	1_0190	12	0	0.0098	0.017
Seed number per pod_BF 2009C	1_0249	12	0	0.0025	0.0425	Dro-3
Seed number per plant_BF 2009B	1_0249	12	0	0.0025	0.0324
Pod number per plant_BF 2009B	1_0249	12	0	0.0054	0.025
Senescence_Nigeria 2007	1_0457	12	0	0.0016	0.0116
Grain yield_Nigeria 2007	1_0457	12	0	0.007	0.0092
Biomass_Nigeria 2007	1_0830	12	0	0.0063	0.0097
Senescence_Nigeria 2007	1_0830	12	0	0.0078	0.0081
Grain yield_Nigeria 2007	1_0830	12	0	0.0081	0.0087
Pod number per plant_BF 2009B	1_1062	12	0	0.0044	0.026
Seed number per plant_BF 2009B	1_1062	12	0	0.0058	0.0267
Senescence_USA 2009	1_1062	12	0	0.0089	0.0319
Biomass_Nigeria 2007	1_1090	12	0	0.0026	0.0119
Grain yield_Nigeria 2007	1_1090	12	0	0.0091	0.0085
Biomass_BF 2009A	1_1119	12	0	0.00042399	0.0483
100-seed weight_BF 2009B	1_1119	12	0	0.0091	0.0162
